# Supplementary material for: Highly selective detection and differentiation of aminophenol isomers based on a bimetallic metal–organic-framework with peroxidase-like activity
Source: Royal Society of Chemistry journal article supplement (doi:10.1039/d3nj04369j), 2023-12-07
Supplement: d3nj04369j1.pdf [file d3nj04369j1.pdf]

## Supplementary information

Highly selective detection and differentiation of aminophenol isomers based on a bimetallic metal-organic-framework with peroxidase-like activity

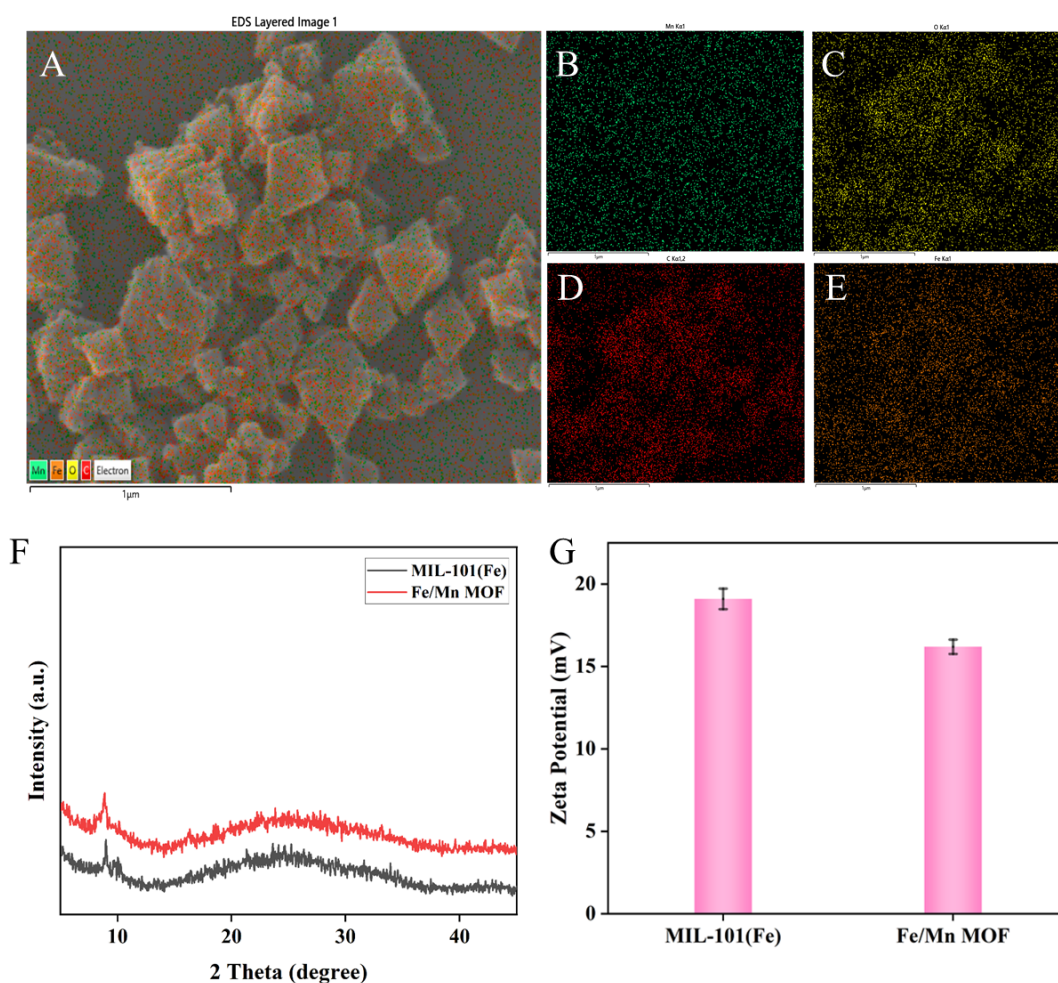

**Fig. S1** EDS diagrams of different elements in Fe/Mn MOF: (A) Fe/Mn MOF; (B) Mn; (C) O; (D) C; (E) Fe; (F) XRD pattern of MIL-101(Fe) and Fe/Mn MOF; (G) Zeta potential of MIL-101(Fe) and Fe/Mn MOF.

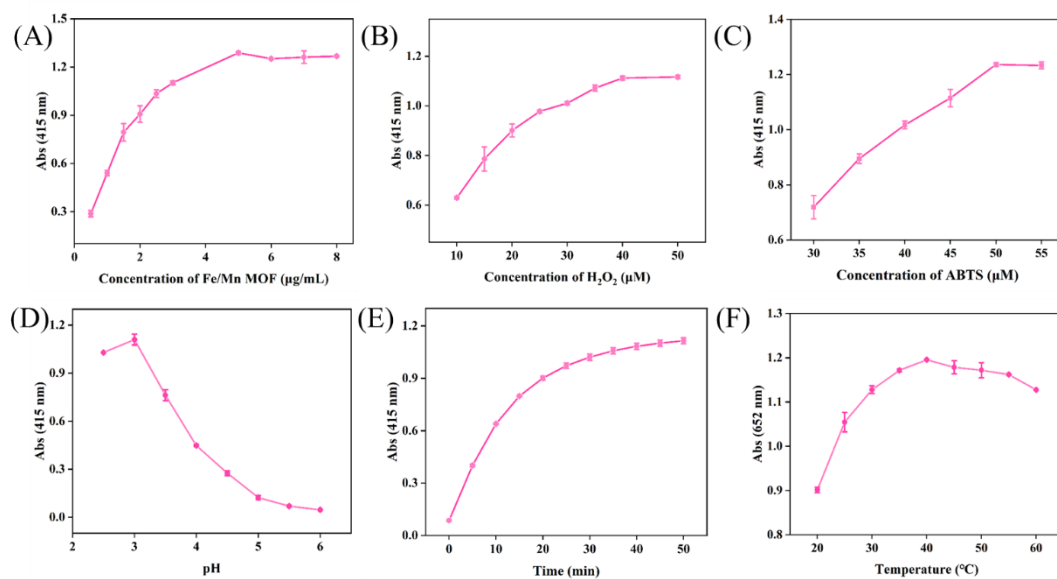

**Fig. S2** Optimization of reaction conditions. (A) Concentration of Fe/Mn MOF ( $\text{H}_2\text{O}_2 = 10 \mu\text{M}$ , ABTS =  $10 \mu\text{M}$ , pH = 3); (B) Concentration of  $\text{H}_2\text{O}_2$  (Fe/Mn MOF =  $5 \mu\text{g/mL}$ , ABTS =  $50 \mu\text{M}$ , pH = 3); (C) Concentration of ABTS (Fe/Mn MOF =  $5 \mu\text{g/mL}$ ,  $\text{H}_2\text{O}_2 = 40 \mu\text{M}$ , pH = 3); (D) pH (Fe/Mn MOF =  $5 \mu\text{g/mL}$ ,  $\text{H}_2\text{O}_2 = 40 \mu\text{M}$ , ABTS =  $50 \mu\text{M}$ ); (E) Time (Fe/Mn MOF =  $5 \mu\text{g/mL}$ ,  $\text{H}_2\text{O}_2 = 40 \mu\text{M}$ , ABTS =  $50 \mu\text{M}$ , pH = 3). (F) Temperature (Fe/Mn MOF =  $5 \mu\text{g/mL}$ ,  $\text{H}_2\text{O}_2 = 40 \mu\text{M}$ , ABTS =  $50 \mu\text{M}$ , pH = 3).

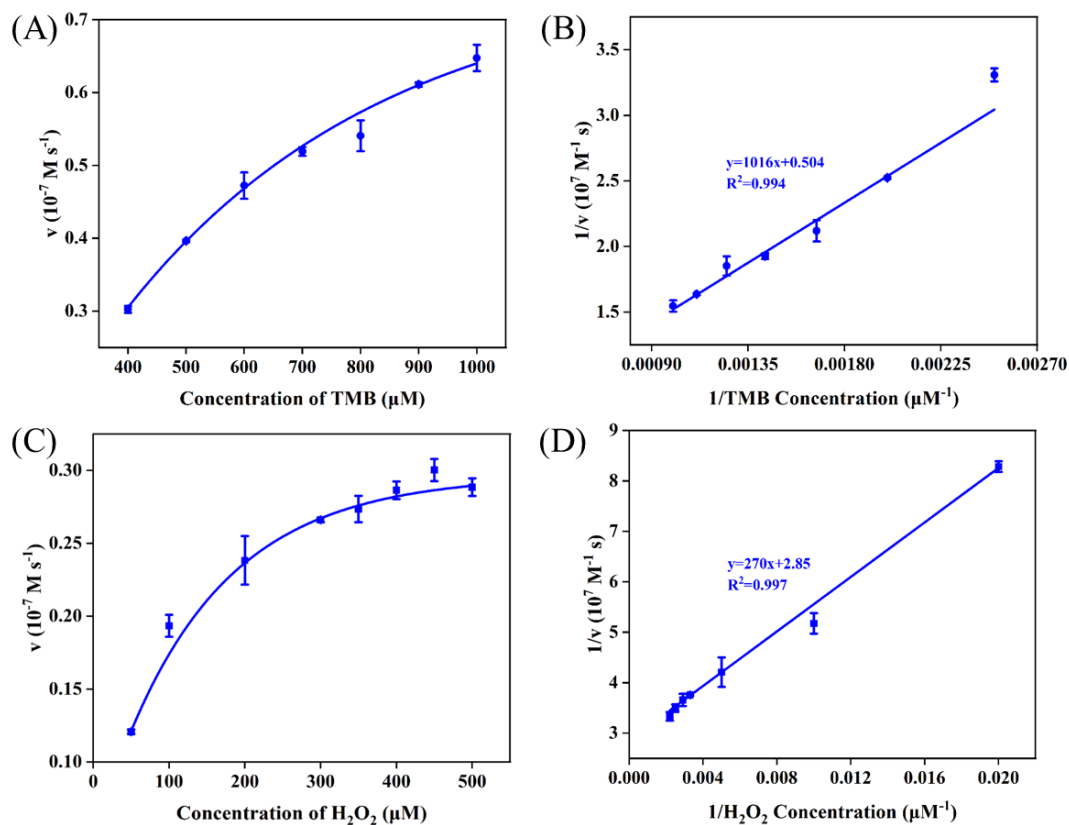

**Fig. S3** Steady-state kinetics assay for (A) TMB and (C)  $\text{H}_2\text{O}_2$ . Lineweaver-Burk plot of the double reciprocal for (B) TMB and (D)  $\text{H}_2\text{O}_2$ .

**Table S1** Detection of m-AP in the real samples (n = 3).

| Sample     | Added( $\mu\text{M}$ ) | Found( $\mu\text{M}$ ) | RSD(%) | Recovery(%) |
|------------|------------------------|------------------------|--------|-------------|
| Lake water | 0                      | Not Found              | --     | --          |
|            | 2.00                   | 1.92                   | 3.32   | 96.0        |
|            | 20.0                   | 20.9                   | 5.23   | 104         |
|            | 40.0                   | 38.0                   | 1.52   | 95.0        |
|            | 0                      | Not Found              | --     | --          |
| Tap water  | 2.00                   | 1.88                   | 3.13   | 94.0        |
|            | 20.0                   | 21.8                   | 1.10   | 109         |
|            | 40.0                   | 39.4                   | 2.92   | 98.5        |
|            | 0                      | Not Found              | --     | --          |

**Table S2** Detection of p-AP in the real samples (n = 3).

| <b>Sample</b> | <b>Added(<math>\mu\text{M}</math>)</b> | <b>Found(<math>\mu\text{M}</math>)</b> | <b>RSD(%)</b> | <b>Recovery(%)</b> |
|---------------|----------------------------------------|----------------------------------------|---------------|--------------------|
|               | 0                                      | Not Found                              | --            | --                 |
|               | 2.00                                   | 1.89                                   | 1.91          | 94.5               |
| Lake water    | 10.0                                   | 10.7                                   | 2.99          | 107                |
|               | 20.0                                   | 21.6                                   | 0.90          | 108                |
|               | 0                                      | Not Found                              | --            | --                 |
|               | 2.00                                   | 2.20                                   | 0.80          | 110                |
| Tap water     | 10.0                                   | 9.55                                   | 3.93          | 95.5               |
|               | 20.0                                   | 21.1                                   | 2.92          | 106                |
